# Supplementary material for: d-orbital energy levels in planar [MIIF4]2−, [MII(NH3)4]2+and [MII(CN)4]2−complexes: the nature of M–L π bonding and the implications for ligand field theory
Source: Royal Society of Chemistry journal article supplement (doi:10.1039/d0dt02022b), 2020-01-01
Supplement: d0dt02022b1.pdf [file d0dt02022b1.pdf]

# **d-Orbital Energy Levels in Planar $[M^{II}F_4]^{n-}$ , $[M^{II}(NH_3)_4]^{n+}$ and $[M^{II}(CN)_4]^{n-}$ Complexes: The Nature of M-L $\pi$ Bonding and the Implications for Ligand Field Theory**

**Robert J. Deeth**

Department of Chemistry  
University of Warwick  
Coventry CV4 7AL, UK  
E-mail: r.j.deeth@warwick.ac.uk

## **Supporting Information**

### Contents

|                                                                                                                   |   |
|-------------------------------------------------------------------------------------------------------------------|---|
| S1: CFT analysis for a planar complex.....                                                                        | 2 |
| S2: DFT optimisations and AI LFT d orbital energies for $[M(NH_3)_4]^{2+}$ , M = Mn, Fe, Co, Ni, Cu.....          | 2 |
| S3: DFT optimisations and AI LFT d orbital energies for $[NiL_4]^m$ , L = F, NH <sub>3</sub> and CN.....          | 5 |
| S4: Geometrical structures and AI LFT d orbital energies for <i>trans</i> - $[NiL_4(NH_3)_2]$ , L = F and CN..... | 7 |

## S1: CFT analysis for a planar complex

The electrostatic radial parameters are:

$\alpha_n = Ze^2 \frac{\langle r^n \rangle}{a^{n+1}}$  where  $\langle r \rangle$  is the average d orbital radius and  $a$  is the distance of the point charge from the nucleus.

The crystal field parameters for a general tetragonal  $D_{4h}$  complex are:

$$Dq = 1/6 \alpha_4(Eq)$$

$$Ds = 2/7 [\alpha_2(Eq) - \alpha_2(Ax)]$$

$$Dt = 2/21 [\alpha_4(Eq) - \alpha_4(Ax)]$$

which simplify for a planar complex where the axial parameters are zero and noting that  $Dq$  and  $Dt$  are both functions of  $\alpha_4$  to:

$$Dq = 1/6 \alpha_4(Eq)$$

$$Ds = 2/7 \alpha_2(Eq)$$

$$Dt = 4/7 Dq$$

The d orbital energies are:

$$E(d_{x^2-y^2}) = 6Dq + 2Ds - Dt = 5 \frac{3}{7} Dq + 2Ds$$

$$E(d_{z^2}) = 6Dq - 2Ds - 6Dt = 2 \frac{4}{7} Dq - 2Ds$$

$$E(d_{xy}) = -4Dq + 2Ds - Dt = -4 \frac{4}{7} Dq + 2Ds$$

$$E(d_{xz}/d_{yz}) = -4Dq - Ds + 4Dt = -1 \frac{5}{7} Dq - Ds$$

## S2: DFT optimisations and AI LFT d orbital energies for $[M(NH_3)_4]^{2+}$ , $M = Mn, Fe, Co, Ni, Cu$

Typical ORCA 3 command line

```
!UKS BP RI def2-TZVP def2-TZVP/J Grid6 NoFinalGrid TightSCF UNO SlowConv Cosmo(water) Opt
```

$[Mn(NH_3)_4]^{2+}$ :  $2S+1 = 2$

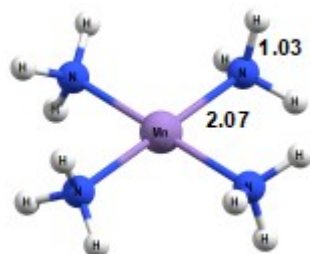

(N.B. The optimised structure had a small  $D_{2d}$ . These angles were idealised to  $180^\circ$  for the AI LFT calculations and are the coordinates given below.)

|    |              |              |              |
|----|--------------|--------------|--------------|
| Mn | -0.001729000 | -0.003546000 | 0.000029000  |
| N  | -1.470005726 | 1.452108680  | -0.006785967 |
| H  | -1.711134134 | 1.746970436  | 0.949473122  |
| H  | -1.205915545 | 2.316840549  | -0.495477977 |

|   |              |              |              |
|---|--------------|--------------|--------------|
| N | 1.453244500  | 1.465657681  | 0.002772228  |
| H | 2.335696392  | 1.194953853  | 0.454594058  |
| H | 1.714249491  | 1.737312068  | -0.955150169 |
| N | -1.454981806 | -1.471012159 | -0.002710984 |
| H | -1.727468910 | -1.728040944 | -0.961520884 |
| H | -2.331858748 | -1.205095655 | 0.462831851  |
| N | 1.465054631  | -1.457720420 | 0.006837037  |
| H | 1.194686676  | -2.340170991 | -0.445357278 |
| H | 1.731526076  | -1.718037518 | 0.966461396  |
| H | -1.174553415 | -2.353870344 | 0.442457599  |
| H | -2.360954369 | 1.167021622  | -0.432181817 |
| H | 1.175740284  | 2.341456292  | 0.463401816  |
| H | 2.343848953  | -1.183146194 | -0.449932923 |

**AILET (Version 3)**

B = 0.004295800 a.u. = 0.117 eV = 942.8 cm<sup>-1</sup>  
 C = 0.014507334 a.u. = 0.395 eV = 3184.0 cm<sup>-1</sup> (C/B= 3.38)

The ligand field one electron eigenfunctions:

| Orbital | Energy (eV) | Energy(cm-1) | dxy       | dyz       | dz2       | dxz       | dx2-y2    |
|---------|-------------|--------------|-----------|-----------|-----------|-----------|-----------|
| 1       | 0.000       | 0.0          | -0.001360 | 0.001757  | -0.999980 | 0.003773  | -0.004529 |
| 2       | 0.087       | 702.4        | 0.000028  | 0.306036  | 0.004138  | 0.952009  | -0.001864 |
| 3       | 0.089       | 714.1        | 0.000018  | -0.952017 | -0.000508 | 0.306037  | -0.002115 |
| 4       | 0.445       | 3592.3       | 0.000761  | -0.001435 | -0.004524 | 0.002439  | 0.999985  |
| 5       | 4.340       | 35008.0      | 0.999999  | 0.000012  | -0.001357 | -0.000029 | -0.000767 |

**[Fe(NH<sub>3</sub>)<sub>4</sub>]<sup>2+</sup>: 2S+1 = 1**

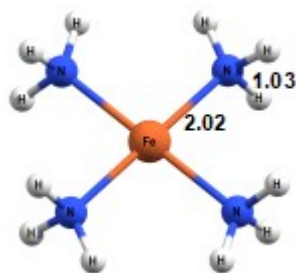

|    |              |              |              |
|----|--------------|--------------|--------------|
| Fe | -0.000938000 | -0.001039000 | 0.000197000  |
| N  | -1.414996000 | 1.439098000  | -0.006281000 |
| H  | -1.339599000 | 2.063196000  | 0.808280000  |
| H  | -1.347243000 | 2.047377000  | -0.833489000 |
| N  | 1.400458000  | 1.450493000  | 0.000515000  |
| H  | 2.374956000  | 1.129158000  | -0.011865000 |
| H  | 1.315968000  | 2.075593000  | -0.812356000 |
| N  | -1.402686000 | -1.452894000 | 0.001892000  |
| H  | -1.325496000 | -2.068691000 | -0.818886000 |
| H  | -2.377149000 | -1.131227000 | 0.001885000  |
| N  | 1.412771000  | -1.440963000 | 0.006517000  |
| H  | 1.338888000  | -2.064149000 | -0.808919000 |
| H  | 1.343270000  | -2.050110000 | 0.832933000  |
| H  | -1.325580000 | -2.068168000 | 0.823017000  |
| H  | -2.386433000 | 1.108534000  | 0.001450000  |
| H  | 1.330377000  | 2.056349000  | 0.829365000  |
| H  | 2.384323000  | -1.110669000 | 0.000804000  |

**AILET (Version 3)**

B = 0.004521951 a.u. = 0.123 eV = 992.5 cm<sup>-1</sup>  
 C = 0.016476375 a.u. = 0.448 eV = 3616.1 cm<sup>-1</sup> (C/B= 3.64)

The ligand field one electron eigenfunctions:

| Orbital | Energy (eV) | Energy(cm-1) | dxy       | dyz       | dz2       | dxz       | dx2-y2    |
|---------|-------------|--------------|-----------|-----------|-----------|-----------|-----------|
| 1       | 0.000       | 0.0          | -0.001149 | 0.003202  | -0.999976 | 0.006060  | 0.000274  |
| 2       | 0.066       | 531.7        | 0.001121  | 0.264616  | 0.006690  | 0.964329  | -0.001091 |
| 3       | 0.067       | 541.6        | 0.000900  | 0.964345  | 0.001483  | -0.264628 | 0.002792  |
| 4       | 0.373       | 3005.6       | 0.000694  | -0.002405 | 0.000276  | 0.001789  | 0.999995  |
| 5       | 3.987       | 32159.5      | 0.999998  | -0.001159 | -0.001158 | -0.000837 | -0.000695 |

**[Co(NH<sub>3</sub>)<sub>4</sub>]<sup>2+</sup>: 2S+1 = 2**

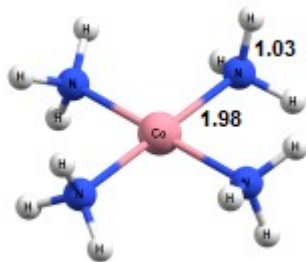

|    |              |              |              |
|----|--------------|--------------|--------------|
| Co | -0.001791000 | -0.000843000 | 0.000868000  |
| N  | -1.410854000 | 1.396567000  | -0.002987000 |
| H  | -1.668666000 | 1.686150000  | 0.950098000  |
| H  | -1.138939000 | 2.257421000  | -0.493160000 |
| N  | 1.395694000  | 1.408408000  | 0.001138000  |
| H  | 2.256634000  | 1.137701000  | 0.491839000  |
| H  | 1.685139000  | 1.663674000  | -0.952677000 |
| N  | -1.398035000 | -1.411155000 | 0.003372000  |
| H  | -1.673530000 | -1.681803000 | -0.950327000 |
| H  | -2.266546000 | -1.135496000 | 0.477605000  |
| N  | 1.407956000  | -1.397837000 | 0.002017000  |
| H  | 1.135015000  | -2.263432000 | -0.479121000 |
| H  | 1.670653000  | -1.678891000 | 0.956329000  |
| H  | -1.110159000 | -2.280940000 | 0.467897000  |
| H  | -2.287348000 | 1.104664000  | -0.452061000 |
| H  | 1.103867000  | 2.286065000  | 0.447975000  |
| H  | 2.281802000  | -1.108367000 | -0.453749000 |

**AILEFT (Version 3)**

|   |   |                    |            |                                       |
|---|---|--------------------|------------|---------------------------------------|
| B | = | 0.004953322 a.u. = | 0.135 eV = | 1087.1 cm** <sup>-1</sup>             |
| C | = | 0.017404754 a.u. = | 0.474 eV = | 3819.9 cm** <sup>-1</sup> (C/B= 3.51) |

The ligand field one electron eigenfunctions:

| Orbital | Energy (eV) | Energy (cm <sup>-1</sup> ) | dxy       | dyz       | dz <sup>2</sup> | dxz       | dx <sup>2</sup> -y <sup>2</sup> |
|---------|-------------|----------------------------|-----------|-----------|-----------------|-----------|---------------------------------|
| 1       | 0.000       | 0.0                        | -0.000051 | 0.002746  | -0.999980       | 0.005639  | 0.000212                        |
| 2       | 0.038       | 308.1                      | 0.000062  | 0.290626  | 0.006194        | 0.956814  | -0.002196                       |
| 3       | 0.039       | 316.8                      | -0.000067 | 0.956831  | 0.000989        | -0.290631 | 0.002685                        |
| 4       | 0.284       | 2292.6                     | 0.000610  | -0.001931 | 0.000223        | 0.002881  | 0.999994                        |
| 5       | 3.820       | 30813.2                    | 1.000000  | 0.000048  | -0.000052       | -0.000080 | -0.000610                       |

**[Ni(NH<sub>3</sub>)<sub>4</sub>]<sup>2+</sup>: 2S+1 = 1**

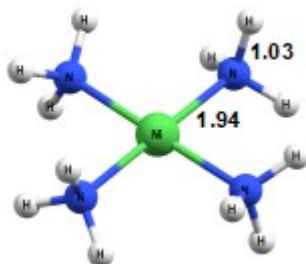

|    |              |              |              |
|----|--------------|--------------|--------------|
| Ni | -0.001739000 | -0.000906000 | 0.000557000  |
| N  | -1.380839000 | 1.366316000  | -0.020276000 |
| H  | -1.636021000 | 1.650644000  | 0.935246000  |
| H  | -1.099710000 | 2.220866000  | -0.515345000 |
| N  | 1.365681000  | 1.378363000  | 0.017855000  |
| H  | 2.219808000  | 1.098857000  | 0.514609000  |
| H  | 1.650984000  | 1.630182000  | -0.938266000 |
| N  | -1.368166000 | -1.380892000 | 0.020149000  |
| H  | -1.642009000 | -1.645465000 | -0.935884000 |
| H  | -2.228695000 | -1.097591000 | 0.503433000  |
| N  | 1.378054000  | -1.367853000 | -0.014285000 |
| H  | 1.096061000  | -2.227824000 | -0.499352000 |
| H  | 1.638361000  | -1.642941000 | 0.942570000  |
| H  | -1.071697000 | -2.245567000 | 0.487911000  |
| H  | -2.250651000 | 1.067366000  | -0.476757000 |
| H  | 1.066549000  | 2.249885000  | 0.470924000  |
| H  | 2.244920000  | -1.071550000 | -0.478030000 |

**AILEFT (Version 3)**

B = 0.005402533 a.u. = 0.147 eV = 1185.7 cm<sup>-1</sup>  
 C = 0.018250726 a.u. = 0.497 eV = 4005.6 cm<sup>-1</sup> (C/B= 3.38)

The ligand field one electron eigenfunctions:

| Orbital | Energy (eV) | Energy (cm <sup>-1</sup> ) | dxy       | dyz       | dz2       | dxz       | dx2-y2    |
|---------|-------------|----------------------------|-----------|-----------|-----------|-----------|-----------|
| 1       | 0.000       | 0.0                        | -0.000058 | 0.011827  | -0.999665 | 0.023014  | 0.000148  |
| 2       | 0.009       | 71.8                       | 0.000045  | 0.338593  | 0.025659  | 0.940582  | -0.001352 |
| 3       | 0.010       | 79.7                       | -0.000022 | 0.940858  | 0.003332  | -0.338780 | 0.001857  |
| 4       | 0.308       | 2485.3                     | 0.000641  | -0.001291 | 0.000176  | 0.001898  | 0.999997  |
| 5       | 3.804       | 30683.1                    | 1.000000  | 0.000007  | -0.000059 | -0.000050 | -0.000641 |

[Cu(NH<sub>3</sub>)<sub>4</sub>]<sup>2+</sup>: 2S+1 = 2

(N.B. The optimised structure had a small D<sub>2d</sub> distortion. These angles were idealised to 180 ° for the AI LFT calculations and are the coordinates given below.)

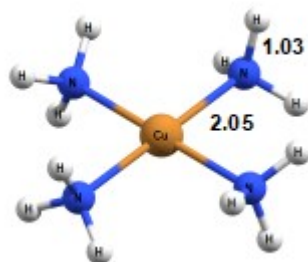

|    |              |              |              |
|----|--------------|--------------|--------------|
| Cu | -0.001451000 | -0.000925000 | 0.000898000  |
| N  | -1.457131000 | 1.442563000  | -0.003047000 |
| H  | -1.729401000 | 1.728796000  | 0.944746000  |
| H  | -1.159707000 | 2.293816000  | -0.492721000 |
| N  | 1.441906000  | 1.455197000  | -0.001061000 |
| H  | 2.296029000  | 1.157303000  | 0.483280000  |
| H  | 1.722766000  | 1.729085000  | -0.949995000 |
| N  | -1.444734000 | -1.456973000 | 0.002857000  |
| H  | -1.721905000 | -1.736952000 | -0.945379000 |
| H  | -2.300897000 | -1.156969000 | 0.482264000  |
| N  | 1.454437000  | -1.444620000 | 0.004843000  |
| H  | 1.157893000  | -2.298080000 | -0.481510000 |
| H  | 1.726016000  | -1.726722000 | 0.954075000  |
| H  | -1.138523000 | -2.310328000 | 0.483292000  |
| H  | -2.314700000 | 1.133184000  | -0.473832000 |
| H  | 1.134877000  | 2.311848000  | 0.472951000  |
| H  | 2.312313000  | -1.136941000 | -0.466502000 |

AILFT (Version 3)

The ligand field one electron eigenfunctions:

| Orbital | Energy (eV) | Energy (cm <sup>-1</sup> ) | dxy       | dyz       | dz2       | dxz       | dx2-y2    |
|---------|-------------|----------------------------|-----------|-----------|-----------|-----------|-----------|
| 1       | 0.000       | 0.0                        | 0.000033  | -0.344634 | -0.073520 | -0.935853 | 0.001277  |
| 2       | 0.001       | 6.4                        | -0.000245 | 0.938220  | 0.006096  | -0.345982 | 0.001598  |
| 3       | 0.056       | 448.8                      | -0.000033 | 0.031142  | -0.997275 | 0.066877  | 0.000059  |
| 4       | 0.349       | 2815.3                     | 0.000754  | -0.001061 | 0.000143  | 0.001744  | 0.999998  |
| 5       | 3.976       | 32072.2                    | 1.000000  | 0.000243  | -0.000029 | -0.000053 | -0.000754 |

### S3: DFT optimisations and AI LFT d orbital energies for [NiL<sub>4</sub>]<sup>m</sup>, L = F, NH<sub>3</sub> and CN

Typical ORCA 4 command lines:

```
!RKS BP RI def2-TZVP/C Grid6 NoFinalGrid TightSCF UNO SlowConv Opt
!CPCM(water)
!KDIIS
```

[NiF<sub>4</sub>]<sup>2-</sup>: 2S+1 = 1

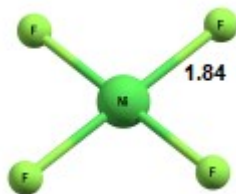

|    |              |              |             |
|----|--------------|--------------|-------------|
| Ni | 0.000000000  | 0.000000000  | 0.000000000 |
| F  | 1.840529000  | 0.000000000  | 0.000000000 |
| F  | -1.840529000 | 0.000000000  | 0.000000000 |
| F  | 0.000000000  | 1.839215000  | 0.000000000 |
| F  | 0.000000000  | -1.839215000 | 0.000000000 |

**AILEFT (ORCA 4)**

Racah Parameters :

|             |   |                    |             |                             |
|-------------|---|--------------------|-------------|-----------------------------|
| A           | = | 0.923436210 a.u. = | 25.128 eV = | 202670.8 cm** <sup>-1</sup> |
| B           | = | 0.005656900 a.u. = | 0.154 eV =  | 1241.5 cm** <sup>-1</sup>   |
| C           | = | 0.017691208 a.u. = | 0.481 eV =  | 3882.8 cm** <sup>-1</sup>   |
| C/B = 3.127 |   |                    |             |                             |

The ligand field one electron eigenfunctions:

| Orbital | Energy (eV) | Energy(cm <sup>-1</sup> ) | dxy       | dyz       | dz2       | dxz       | dx2-y2    |
|---------|-------------|---------------------------|-----------|-----------|-----------|-----------|-----------|
| 1       | 0.000       | 0.0                       | -0.000000 | -0.000000 | -0.999998 | -0.002048 | 0.000033  |
| 2       | 0.255       | 2059.9                    | -0.000000 | -0.000000 | 0.002048  | -0.999998 | -0.000075 |
| 3       | 0.256       | 2062.4                    | -0.000430 | -1.000000 | 0.000000  | 0.000000  | -0.000000 |
| 4       | 0.799       | 6440.6                    | -1.000000 | 0.000430  | 0.000000  | 0.000000  | 0.000000  |
| 5       | 2.475       | 19959.3                   | 0.000000  | -0.000000 | 0.000033  | -0.000075 | 1.000000  |

**[Ni(NH<sub>3</sub>)<sub>4</sub>]<sup>2+</sup>: 2S+1 = 1**

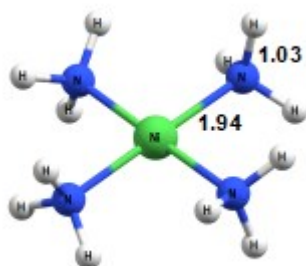

|    |              |              |              |
|----|--------------|--------------|--------------|
| Ni | 0.000007000  | 0.000582000  | 0.000221000  |
| N  | 1.370047000  | 1.370005000  | 0.012784000  |
| H  | 1.640468000  | 1.630346000  | -0.946262000 |
| H  | 1.037923000  | 2.218747000  | 0.486983000  |
| N  | -1.370057000 | 1.369950000  | -0.012615000 |
| H  | -2.213789000 | 1.042081000  | -0.498623000 |
| H  | -1.640185000 | 1.630775000  | 0.946381000  |
| N  | 1.369431000  | -1.369662000 | -0.016419000 |
| H  | 1.630080000  | -1.642615000 | 0.941802000  |
| H  | 2.217992000  | -1.036421000 | -0.490206000 |
| N  | -1.369439000 | -1.369643000 | 0.016335000  |
| H  | -1.041852000 | -2.211889000 | 0.505184000  |
| H  | -1.629658000 | -1.642657000 | -0.941982000 |
| H  | 1.041609000  | -2.211941000 | -0.505054000 |
| H  | 2.213659000  | 1.042385000  | 0.499176000  |
| H  | -1.038107000 | 2.218452000  | -0.487357000 |
| H  | -2.218210000 | -1.036360000 | 0.489712000  |

**AILEFT (ORCA 4)**

Racah Parameters :

|             |   |                    |             |                             |
|-------------|---|--------------------|-------------|-----------------------------|
| A           | = | 0.904268340 a.u. = | 24.606 eV = | 198464.0 cm** <sup>-1</sup> |
| B           | = | 0.005629284 a.u. = | 0.153 eV =  | 1235.5 cm** <sup>-1</sup>   |
| C           | = | 0.021038208 a.u. = | 0.572 eV =  | 4617.4 cm** <sup>-1</sup>   |
| C/B = 3.737 |   |                    |             |                             |

The ligand field one electron eigenfunctions:

| Orbital | Energy (eV) | Energy(cm <sup>-1</sup> ) | dxy       | dyz       | dz2       | dxz       | dx2-y2    |
|---------|-------------|---------------------------|-----------|-----------|-----------|-----------|-----------|
| 1       | 0.000       | 0.0                       | -0.000057 | -0.075232 | -0.000400 | -0.997165 | -0.001363 |
| 2       | 0.000       | 0.6                       | -0.001358 | -0.997165 | -0.000068 | 0.075232  | 0.000060  |

|   |       |         |           |           |           |           |          |
|---|-------|---------|-----------|-----------|-----------|-----------|----------|
| 3 | 0.021 | 167.9   | 0.000000  | -0.000098 | 1.000000  | -0.000394 | 0.000038 |
| 4 | 0.380 | 3064.3  | 0.000007  | -0.000043 | -0.000038 | -0.001363 | 0.999999 |
| 5 | 2.445 | 19721.5 | -0.999999 | 0.001358  | 0.000000  | -0.000046 | 0.000007 |

[Ni(CN)<sub>4</sub>]<sup>2-</sup>: 2S+1 = 1

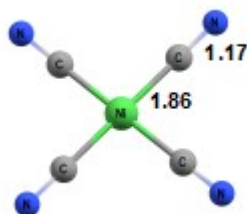

|    |              |              |             |
|----|--------------|--------------|-------------|
| Ni | 0.000000000  | 0.000000000  | 0.000000000 |
| C  | 1.860000000  | 0.000000000  | 0.000000000 |
| C  | -1.860000000 | 0.000000000  | 0.000000000 |
| C  | 0.000000000  | 1.860000000  | 0.000000000 |
| C  | 0.000000000  | -1.860000000 | 0.000000000 |
| N  | 3.033951000  | 0.000000000  | 0.000000000 |
| N  | -3.033951000 | 0.000000000  | 0.000000000 |
| N  | 0.000000000  | 3.033951000  | 0.000000000 |
| N  | 0.000000000  | -3.033951000 | 0.000000000 |

**AI LFT (ORCA 4)**

Racah Parameters :

|             |   |                    |             |                           |
|-------------|---|--------------------|-------------|---------------------------|
| A           | = | 0.878562169 a.u. = | 23.907 eV = | 192822.1 cm <sup>-1</sup> |
| B           | = | 0.005620443 a.u. = | 0.153 eV =  | 1233.5 cm <sup>-1</sup>   |
| C           | = | 0.015277010 a.u. = | 0.416 eV =  | 3352.9 cm <sup>-1</sup>   |
| C/B = 2.718 |   |                    |             |                           |

The ligand field one electron eigenfunctions:

| Orbital | Energy (eV) | Energy (cm <sup>-1</sup> ) | dxy       | dyz       | dz <sup>2</sup> | dxz       | dx <sup>2</sup> -y <sup>2</sup> |
|---------|-------------|----------------------------|-----------|-----------|-----------------|-----------|---------------------------------|
| 1       | 0.000       | 0.0                        | 0.000005  | -1.000000 | -0.000000       | 0.000001  | 0.000000                        |
| 2       | 0.000       | 1.6                        | -0.000000 | -0.000001 | 0.000486        | -1.000000 | 0.000011                        |
| 3       | 0.086       | 693.5                      | 0.000000  | -0.000000 | 1.000000        | 0.000486  | 0.000014                        |
| 4       | 0.121       | 978.8                      | -1.000000 | -0.000005 | 0.000000        | 0.000000  | 0.000000                        |
| 5       | 4.725       | 38106.7                    | 0.000000  | 0.000000  | -0.000014       | 0.000011  | 1.000000                        |

## S4: Geometrical structures and AI LFT d orbital energies for *trans*-[NiL<sub>4</sub>(NH<sub>3</sub>)<sub>2</sub>], L = F and CN

*trans*-[NiF<sub>4</sub>(NH<sub>3</sub>)<sub>2</sub>]: 2S+1 = 3

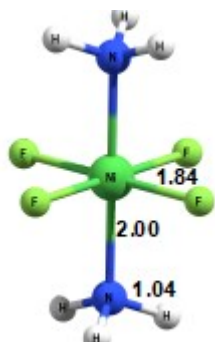

|    |              |              |              |
|----|--------------|--------------|--------------|
| Ni | 0.000000000  | 0.000000000  | 0.000000000  |
| F  | 1.840000000  | 0.000000000  | 0.000000000  |
| F  | -1.840000000 | 0.000000000  | 0.000000000  |
| F  | 0.000000000  | 1.840000000  | 0.000000000  |
| F  | 0.000000000  | -1.840000000 | 0.000000000  |
| N  | 0.000000000  | 0.000000000  | -2.000000000 |

|   |              |              |              |
|---|--------------|--------------|--------------|
| H | 0.968583000  | -0.008452000 | -2.378649000 |
| H | -0.491612000 | -0.834591000 | -2.378649000 |
| H | -0.476971000 | 0.843044000  | -2.378649000 |
| N | 0.000000000  | 0.000000000  | 2.000000000  |
| H | -0.968583000 | -0.008452000 | 2.378649000  |
| H | 0.491612000  | -0.834591000 | 2.378649000  |
| H | 0.476971000  | 0.843044000  | 2.378649000  |

**AILEFT (ORCA 4)**

Racah Parameters :

|   |   |                    |             |                             |
|---|---|--------------------|-------------|-----------------------------|
| A | = | 0.921206144 a.u. = | 25.067 eV = | 202181.4 cm** <sup>-1</sup> |
| B | = | 0.005781433 a.u. = | 0.157 eV =  | 1268.9 cm** <sup>-1</sup>   |
| C | = | 0.017312475 a.u. = | 0.471 eV =  | 3799.6 cm** <sup>-1</sup>   |

C/B = 2.994

The ligand field one electron eigenfunctions:

| Orbital | Energy (eV) | Energy (cm <sup>-1</sup> ) | dxy       | dyz       | dz2       | dxz       | dx2-y2    |
|---------|-------------|----------------------------|-----------|-----------|-----------|-----------|-----------|
| 1       | 0.000       | 0.0                        | 0.009076  | -0.999959 | 0.000000  | 0.000013  | -0.000000 |
| 2       | 0.001       | 11.9                       | 0.000000  | -0.000013 | -0.000122 | -1.000000 | 0.000047  |
| 3       | 0.305       | 2457.2                     | -0.999959 | -0.009076 | -0.000000 | -0.000000 | 0.000000  |
| 4       | 1.458       | 11756.5                    | -0.000000 | 0.000000  | 0.999997  | -0.000122 | 0.002574  |
| 5       | 1.800       | 14515.5                    | 0.000000  | -0.000000 | -0.002574 | 0.000048  | 0.999997  |

**trans-[Ni(CN)<sub>4</sub>(NH<sub>3</sub>)<sub>2</sub>]: 2S+1 = 3**

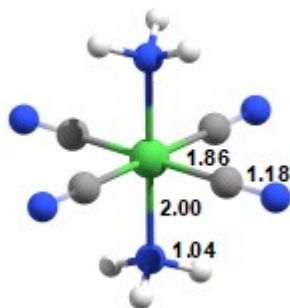

|    |              |              |              |
|----|--------------|--------------|--------------|
| Ni | 0.000000000  | 0.000000000  | 0.000000000  |
| C  | 1.857673000  | 0.000001000  | 0.000091000  |
| C  | -1.857673000 | -0.000001000 | -0.000091000 |
| C  | 0.000001000  | 1.857893000  | 0.000000000  |
| C  | -0.000001000 | -1.857892000 | 0.000000000  |
| N  | 3.040481000  | 0.000002000  | -0.000055000 |
| N  | -3.040482000 | -0.000001000 | 0.000055000  |
| N  | 0.000002000  | 3.040720000  | 0.000000000  |
| N  | -0.000002000 | -3.040720000 | 0.000000000  |
| N  | 0.000000000  | 0.000000000  | -2.000000000 |
| H  | 0.968583000  | -0.008452000 | -2.378649000 |
| H  | -0.491612000 | -0.834591000 | -2.378649000 |
| H  | -0.476971000 | 0.843044000  | -2.378649000 |
| N  | 0.000000000  | 0.000000000  | 2.000000000  |
| H  | -0.968583000 | -0.008452000 | 2.378649000  |
| H  | 0.491612000  | -0.834591000 | 2.378649000  |
| H  | 0.476971000  | 0.843044000  | 2.378649000  |

**AILEFT (ORCA 4)**

Racah Parameters :

|   |   |                    |             |                             |
|---|---|--------------------|-------------|-----------------------------|
| A | = | 0.870125369 a.u. = | 23.677 eV = | 190970.4 cm** <sup>-1</sup> |
| B | = | 0.006317027 a.u. = | 0.172 eV =  | 1386.4 cm** <sup>-1</sup>   |
| C | = | 0.014076307 a.u. = | 0.383 eV =  | 3089.4 cm** <sup>-1</sup>   |

C/B = 2.228

The ligand field one electron eigenfunctions:

| Orbital | Energy (eV) | Energy (cm <sup>-1</sup> ) | dxy       | dyz       | dz2       | dxz       | dx2-y2    |
|---------|-------------|----------------------------|-----------|-----------|-----------|-----------|-----------|
| 1       | 0.000       | 0.0                        | 0.996640  | -0.081909 | 0.000000  | -0.000000 | -0.000000 |
| 2       | 0.125       | 1011.9                     | -0.000030 | -0.000366 | 0.000822  | -0.999936 | 0.011315  |
| 3       | 0.126       | 1015.1                     | -0.081909 | -0.996640 | -0.000000 | 0.000367  | -0.000004 |
| 4       | 2.661       | 21462.7                    | -0.000000 | 0.000000  | 1.000000  | 0.000828  | 0.000457  |
| 5       | 4.077       | 32882.8                    | 0.000000  | -0.000000 | -0.000466 | 0.011314  | 0.999936  |
